# Supplementary material for: Mitochondrial lipid droplet formation as a detoxification mechanism to sequester and degrade excessive urothelial membranes
Source: PubMed Central journal article supplement — Mol Biol Cell. 2019 Nov 15;30(24):2969–84. doi: 10.1091/mbc.E19-05-0284 (PMC6857570; doi:10.1091/mbc.e19-05-0284), 2019-11-15
Supplement: mbc-30-2969-s001.pdf [file mbc-30-2969-s001.pdf]

# Supplemental Materials

*Molecular Biology of the Cell*

Liao et al.

## Supplemental figure legends

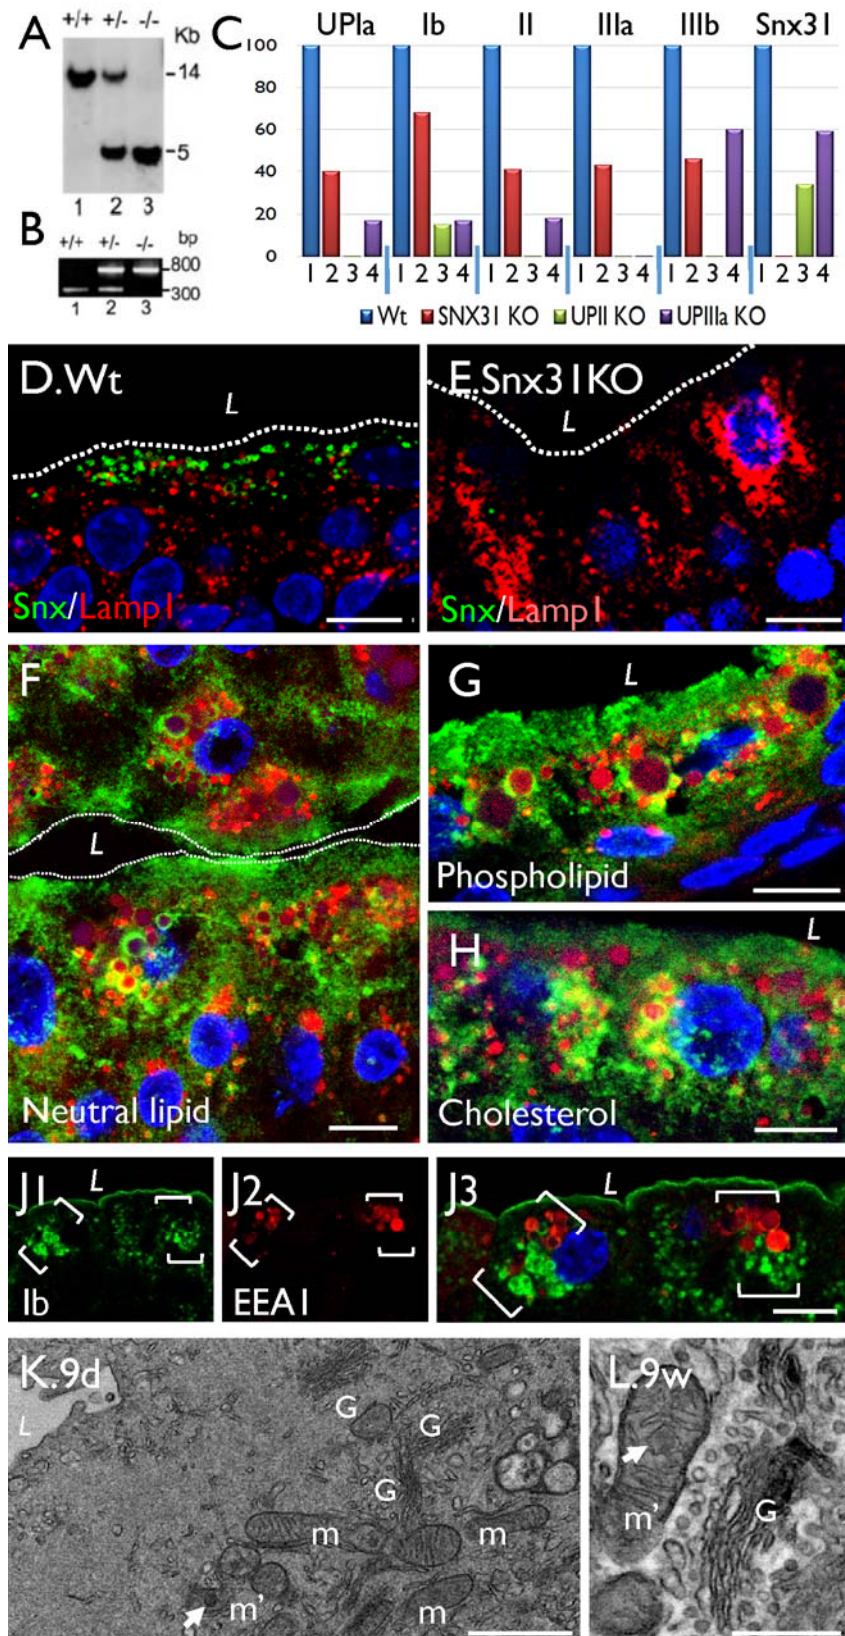

**Figure S1. Generation of the *Snx31*-KO mice and LD accumulation (related to Fig. 1).** (A) A 1070-bp fragment of the mouse *Snx31* gene (NM\_025712), including Exon 3, which encodes part of the PX domain (39 amino acids out of 109), involved in binding phosphoinositides of vesicular membranes, was deleted using homologous recombination in embryonic stem cells (129SV background), resulting in a frame shift with a premature stop codon. (B) Southern blot showing the characterization of the +/+, +/-, and -/- mice. (C) Quantification of proteins shown in Fig. 8A. (D and E) Paraffin-sections of (D) wild type and (E) *Snx31*-KO mouse bladder were double-stained using antibodies to *Snx31* (green) and LAMP1 (red). Note in (D) the association of *Snx31* with the MVBs of wild type urothelium (Vieira et al., 2014), and in (E) the absence of *Snx31* (and the greatly increased LAMP1 staining) in the *Snx31*-KO (see text). (F-H) Frozen sections of the *Snx31*-KO mouse urothelium were double-stained for UPII (green) and (F) neutral lipid (HCS LipidTOX Green-NL), (G) Phospholipids (BODIPY HRC-PL), and (H) cholesterol (BODIPY Cholesteryl). Dashed line and L indicate the apical urothelial surface and luminal space, respectively. (J) Paraffin-section of *Snx31*-KO mouse bladder was double-stained using antibodies to UPIb (green) and EEA1, an early endosome marker (red). Note the uroplakin Ib-positive LDs are EEA1-negative. (K, L) TEM images showing mitochondria (m) and proximal Golgi apparatus (G) in the urothelia of 9-day (K) and 9-week (L) old *Snx31* KO mice. Note in (K) the newly initiated intramitochondrial LD (arrow). Scale bars = 0.5- $\mu$ m in (L); 1- $\mu$ m in (K); 10- $\mu$ m in (D-J).

### Supplemental video legends

## Supplemental Video SVI (related to Fig. 4N)

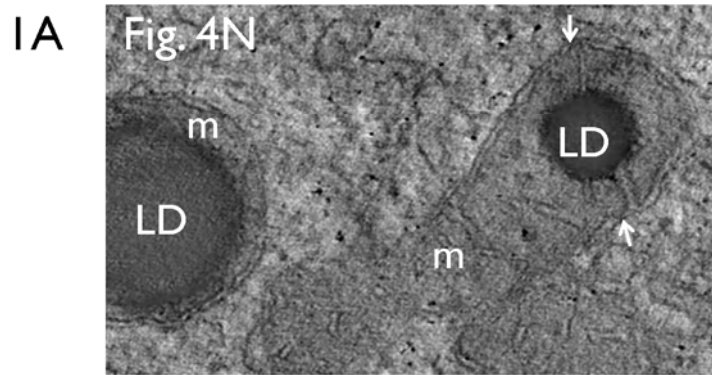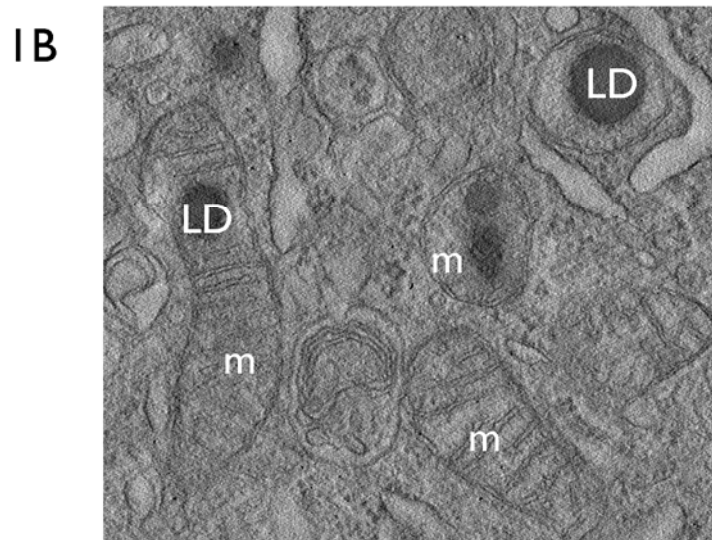

**Supplemental Video SV1A & B. Visualization of the intramitochondrial LDs by EM tomography (A is the basis for Fig. 4N).** Serial images were collected from two different regions of an umbrella cells. Images were taken after the section was tilted every 2-degree from +70 to -70, and processed to generate a video. LD, m and arrows denote lipid droplet, mitochondria, and residual mitochondrial cristae, respectively. Note in (A) the intramitochondrial location of LDs (basis for Fig. 4N), and in (B) the relationship between the LDs and the mitochondrial cristae.

## Supplemental Video SV2 (related to Fig. 4O)

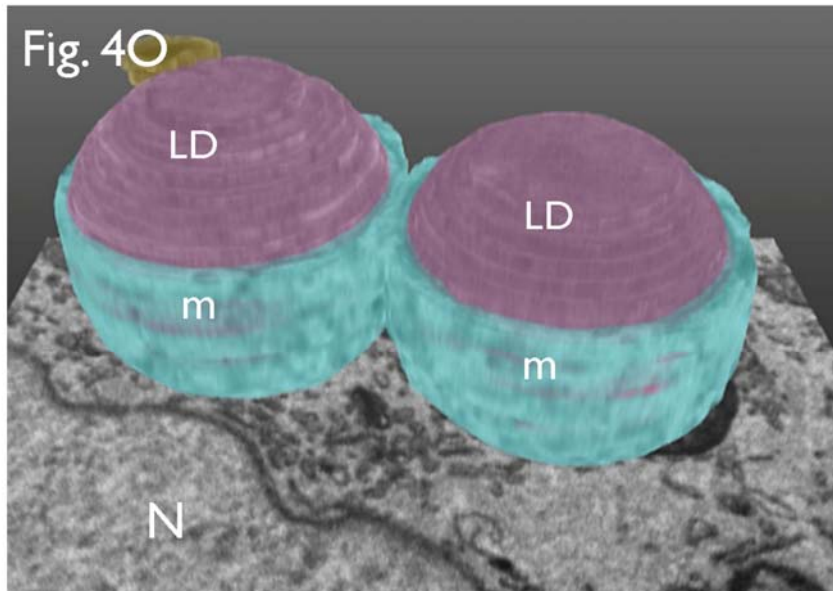

**Supplemental Video SV2. Visualization of intramitochondrial LDs by serial block-face SEM (basis for Fig. 4O).** LD (purple), m (light blue) and N denote lipid droplet, mitochondria and nucleus, respectively. Note the intramitochondrial location of the LD.

**Supplemental Table S1. Sources of reagents**

| <b>Antibody / probe</b>                 | <b>Source</b>                   | <b>Catalog #</b> | <b>Host*</b> | <b>Dilution</b>                 |
|-----------------------------------------|---------------------------------|------------------|--------------|---------------------------------|
| active Caspase 3                        | Novus                           | NB100-56113      | Rb           | IF (10 µg/ml)                   |
| ADFP                                    | Novus                           | NB110-40877      | Rb           | IF (10 µg/ml)                   |
| AIF                                     | R&D                             | AF5824           | Shp          | IF (10 µg/ml)                   |
| Beclin1                                 | Abcam                           | ab62472          | Rb           | IF (10 µg/ml)                   |
| BiP                                     | Dr. Andrew Hu                   | N/A              | Rb           | IF (1:100)                      |
| Calnexin                                | Abcam                           | ab112995         | Ms           | IF (10 µg/ml)                   |
| Cox4                                    | NOVUS                           | NB110-39115      | Rb           | IF (10 µg/ml)                   |
| EEA1                                    | Bioss                           | bs-11250R        | Rb           | IF (10 µg/ml)                   |
| GM130                                   | GeneTex                         | GTX61445         | Rb           | IF (10 µg/ml)                   |
| LAMP1                                   | DSHB                            | 1D4B-f           | Rat          | IF (1:100)                      |
| LC3                                     | Cell Signaling                  | 12741            | Rb           | IF (10 µg/ml)                   |
| PDI                                     | Dr. Andrew Hu                   | N/A              | Rb           | IF (1:100)                      |
| Perilipin                               | Novus                           | NB100-60554      | Gt           | IF (10 µg/ml)                   |
| PINK1                                   | Novus                           | NBP2-36488       | Ms           | IF (10 µg/ml)                   |
| SEC23A                                  | GeneTex                         | GTX109488        | Rb           | IF (10 µg/ml)                   |
| SNX31 (2660)                            | Sun lab<br>(Vieira et al, 2014) | N/A              | Rb           | IF, IEM (1:100),<br>WB (1:1000) |
| TGN38                                   | Novus                           | NB300-575        | Ms           | IF (10 µg/ml)                   |
| α-Tubulin                               | Sigma                           | T5168            | Ms           | IF (1:10,000)                   |
| UPIa (AU-Ia-3, clone 3O13)              | Sun lab<br>(Liao et al, 2018)   | N/A              | Ms           | IF (1:20),<br>WB (1:200)        |
| UPIa (128)                              | Sun lab<br>(Liao et al, 2018)   | N/A              | Rb           | IF, IEM (1:200)                 |
| UPIa (4867)                             | Sun lab<br>(Liao et al, 2018)   | N/A              | Rb           | IF, IEM (1:200),<br>WB (1:2000) |
| UPIb (AU-Ib-2, 2N23)                    | Sun lab<br>(Liao et al, 2018)   | N/A              | Ms           | IF (10 µg/ml),<br>WB (1 µg/ml)  |
| UPIb (7472)                             | Sun lab<br>(Liao et al, 2018)   | N/A              | Rb           | IF, IEM (1:100)                 |
| UPII (S3045)                            | Sun lab<br>(Liao et al, 2018)   | N/A              | Rb           | IF (1:100),<br>WB (1:1000)      |
| UPIIIa (AU-IIIa-1, clone AU1)           | Sun lab<br>(Liang et al, 2001)  | N/A              | Ms           | IF, IEM (1:20),<br>WB (1:200)   |
| UPIIIa (35804)                          | Sun lab<br>(Liao et al, 2018)   | N/A              | Rb           | IF (10 µg/ml)                   |
| UPIIIb (AU-IIIb-1, clone C362)          | Sun lab<br>(Liao et al, 2018)   | N/A              | Ms           | IF (1:20),<br>WB (1:200)        |
| UPIIIb (6177)                           | Sun lab<br>(Liao et al, 2018)   | N/A              | Rb           | IF(1:100),<br>WB (1:1000)       |
| XBP1                                    | Santa Cruz                      | sc-8015          | Ms           | IF (10 µg/ml)                   |
| β-BODIPY™ FL C12-HPC                    | Thermo Fisher                   | D3792            | N/A          | IF (1:1000)                     |
| CholEsteryl BODIPY™ FL C12              | Thermo Fisher                   | C3927MP          | N/A          | IF (1:1000)                     |
| HCS LipidTOX™ Green Neutral Lipid       | Thermo Fisher                   | H34475           | N/A          | IF (1:1000)                     |
| Click-iT™ Plus TUNEL,<br>Alexafluor594  | Thermo Fisher                   | C10618           | N/A          | See Manual                      |
| 4',6-diamidino-2-phenylindole<br>(DAPI) | Thermo Fisher                   | D1306            | N/A          | IF (1:500)                      |

|                                                    |                           |             |     |              |
|----------------------------------------------------|---------------------------|-------------|-----|--------------|
| Donkey anti-rabbit IgG (H+L),<br>Alexafluor 488    | Thermo Fisher             | A-21206     | Dk  | IF (1:200)   |
| Donkey anti-rabbit IgG (H+L),<br>Alexafluor 568    | Thermo Fisher             | A-10042     | Dk  | IF (1:200)   |
| Donkey anti-mouse IgG (H+L),<br>Alexafluor 488     | Thermo Fisher             | A-21202     | Dk  | IF (1:200)   |
| Donkey anti-mouse IgG (H+L),<br>Alexafluor 568     | Thermo Fisher             | A-10037     | Dk  | IF (1:200)   |
| Donkey anti-goat IgG (H+L),<br>Alexafluor 488      | Thermo Fisher             | A-11055     | Dk  | IF (1:200)   |
| Donkey anti-rat IgG (H+L),<br>Alexafluor 647       | Jackson<br>ImmunoResearch | 712-605-153 | Dk  | IF (1:200)   |
| Donkey anti-sheep IgG (H+L),<br>Alexafluor 568     | Thermo Fisher             | A-21099     | Dk  | IF (1:200)   |
| Goat anti-rabbit IgG (H+L),<br>18nm colloidal gold | Jackson<br>ImmunoResearch | 111-215-144 | Gt  | IEM (1:100)  |
| Donkey anti-Mouse IgG HRP                          | Jackson<br>ImmunoResearch | 715-035-150 | Dk  | WB (1:10000) |
| Donkey anti-Rabbit IgG HRP                         | Jackson<br>ImmunoResearch | 711-035-152 | Dk  | WB (1:10000) |
| Hoechst 33258                                      | Thermo Fisher             | H3569       | N/A | IF (1:500)   |

\* Abbreviations: Hosts include Dk (donkey), G (goat), Ms (mouse), Rb (rabbit) and Shp (sheep); IF (immunofluorescent staining); IEM (immune-EM); IB (immune-blot);
